# Supplementary material
Source: PubMed Central journal article supplement (PMC10842592)
Supplement: NIHMS1934267-supplement-5.pdf [file NIHMS1934267-supplement-5.pdf]

503 this experiment. (C) Representative blots from A and B. Total protein analysis was used for  
504 normalization.

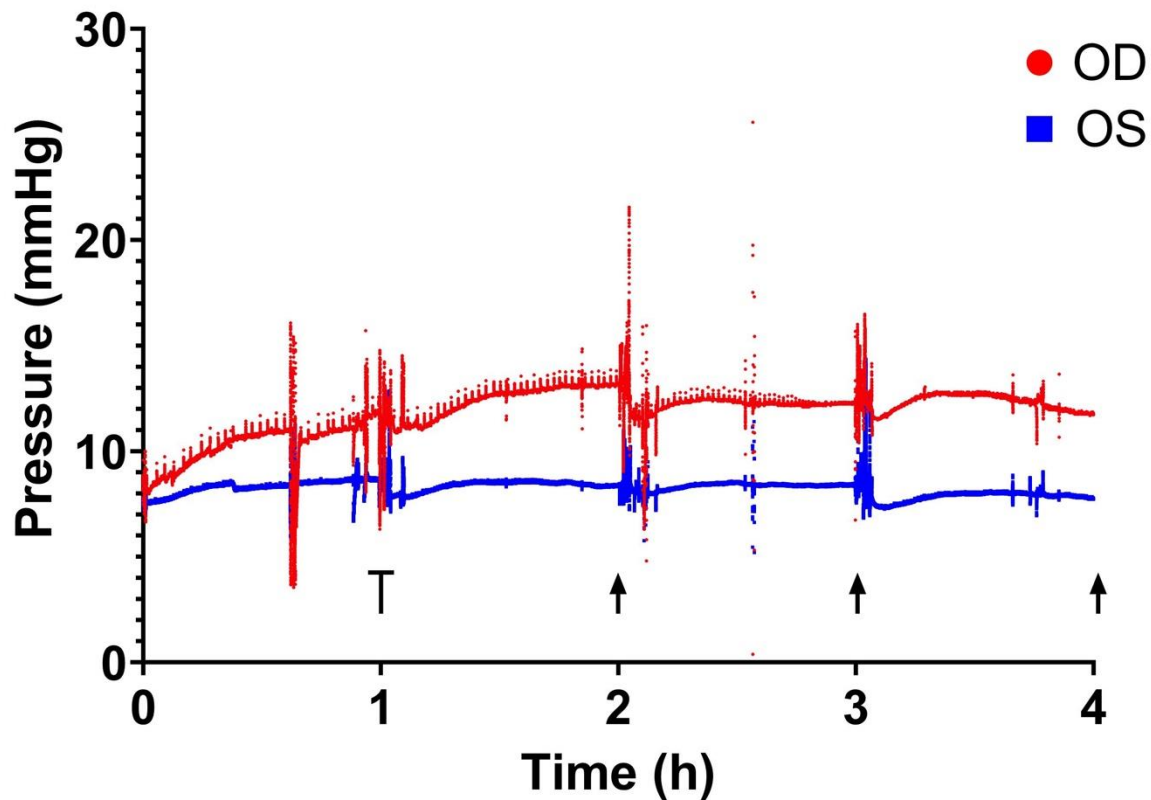

505  
506 *Supplementary Figure 1: Pressure verses time plot of perfused human eyes.* Effluent was  
507 collected and discarded from human eyes perfused under constant flow conditions of 2.5  
508  $\mu\text{l}/\text{min}/\text{mmHg}$  ( $n=3$ ) at 1H ('T' symbol), and effluent was collected for analysis at 2H, 3H, and  
509 4H (arrows). NOTE: In the 3 pairs of human eyes, two pairs were from healthy donors, and one  
510 pair was from a donor with POAG. The OD and OS mean IOP traces are different because the  
511 POAG pair had asymmetric IOP readings between OD and OS.  
512  
513
